# Supplementary material for: ﻿Phylogeny and classification of the Australasian and Indomalayan mimosoid legumes Archidendron and Archidendropsis (Leguminosae, subfamily Caesalpinioideae, mimosoid clade)
Source: PubMed Central journal article supplement (PMC9848999; doi:10.3897/phytokeys.205.79381), 2022-08-22
Supplement: phytokeys-205-299_article-79381__-s002.pdf [file phytokeys-205-299_article-79381__-s002.pdf]

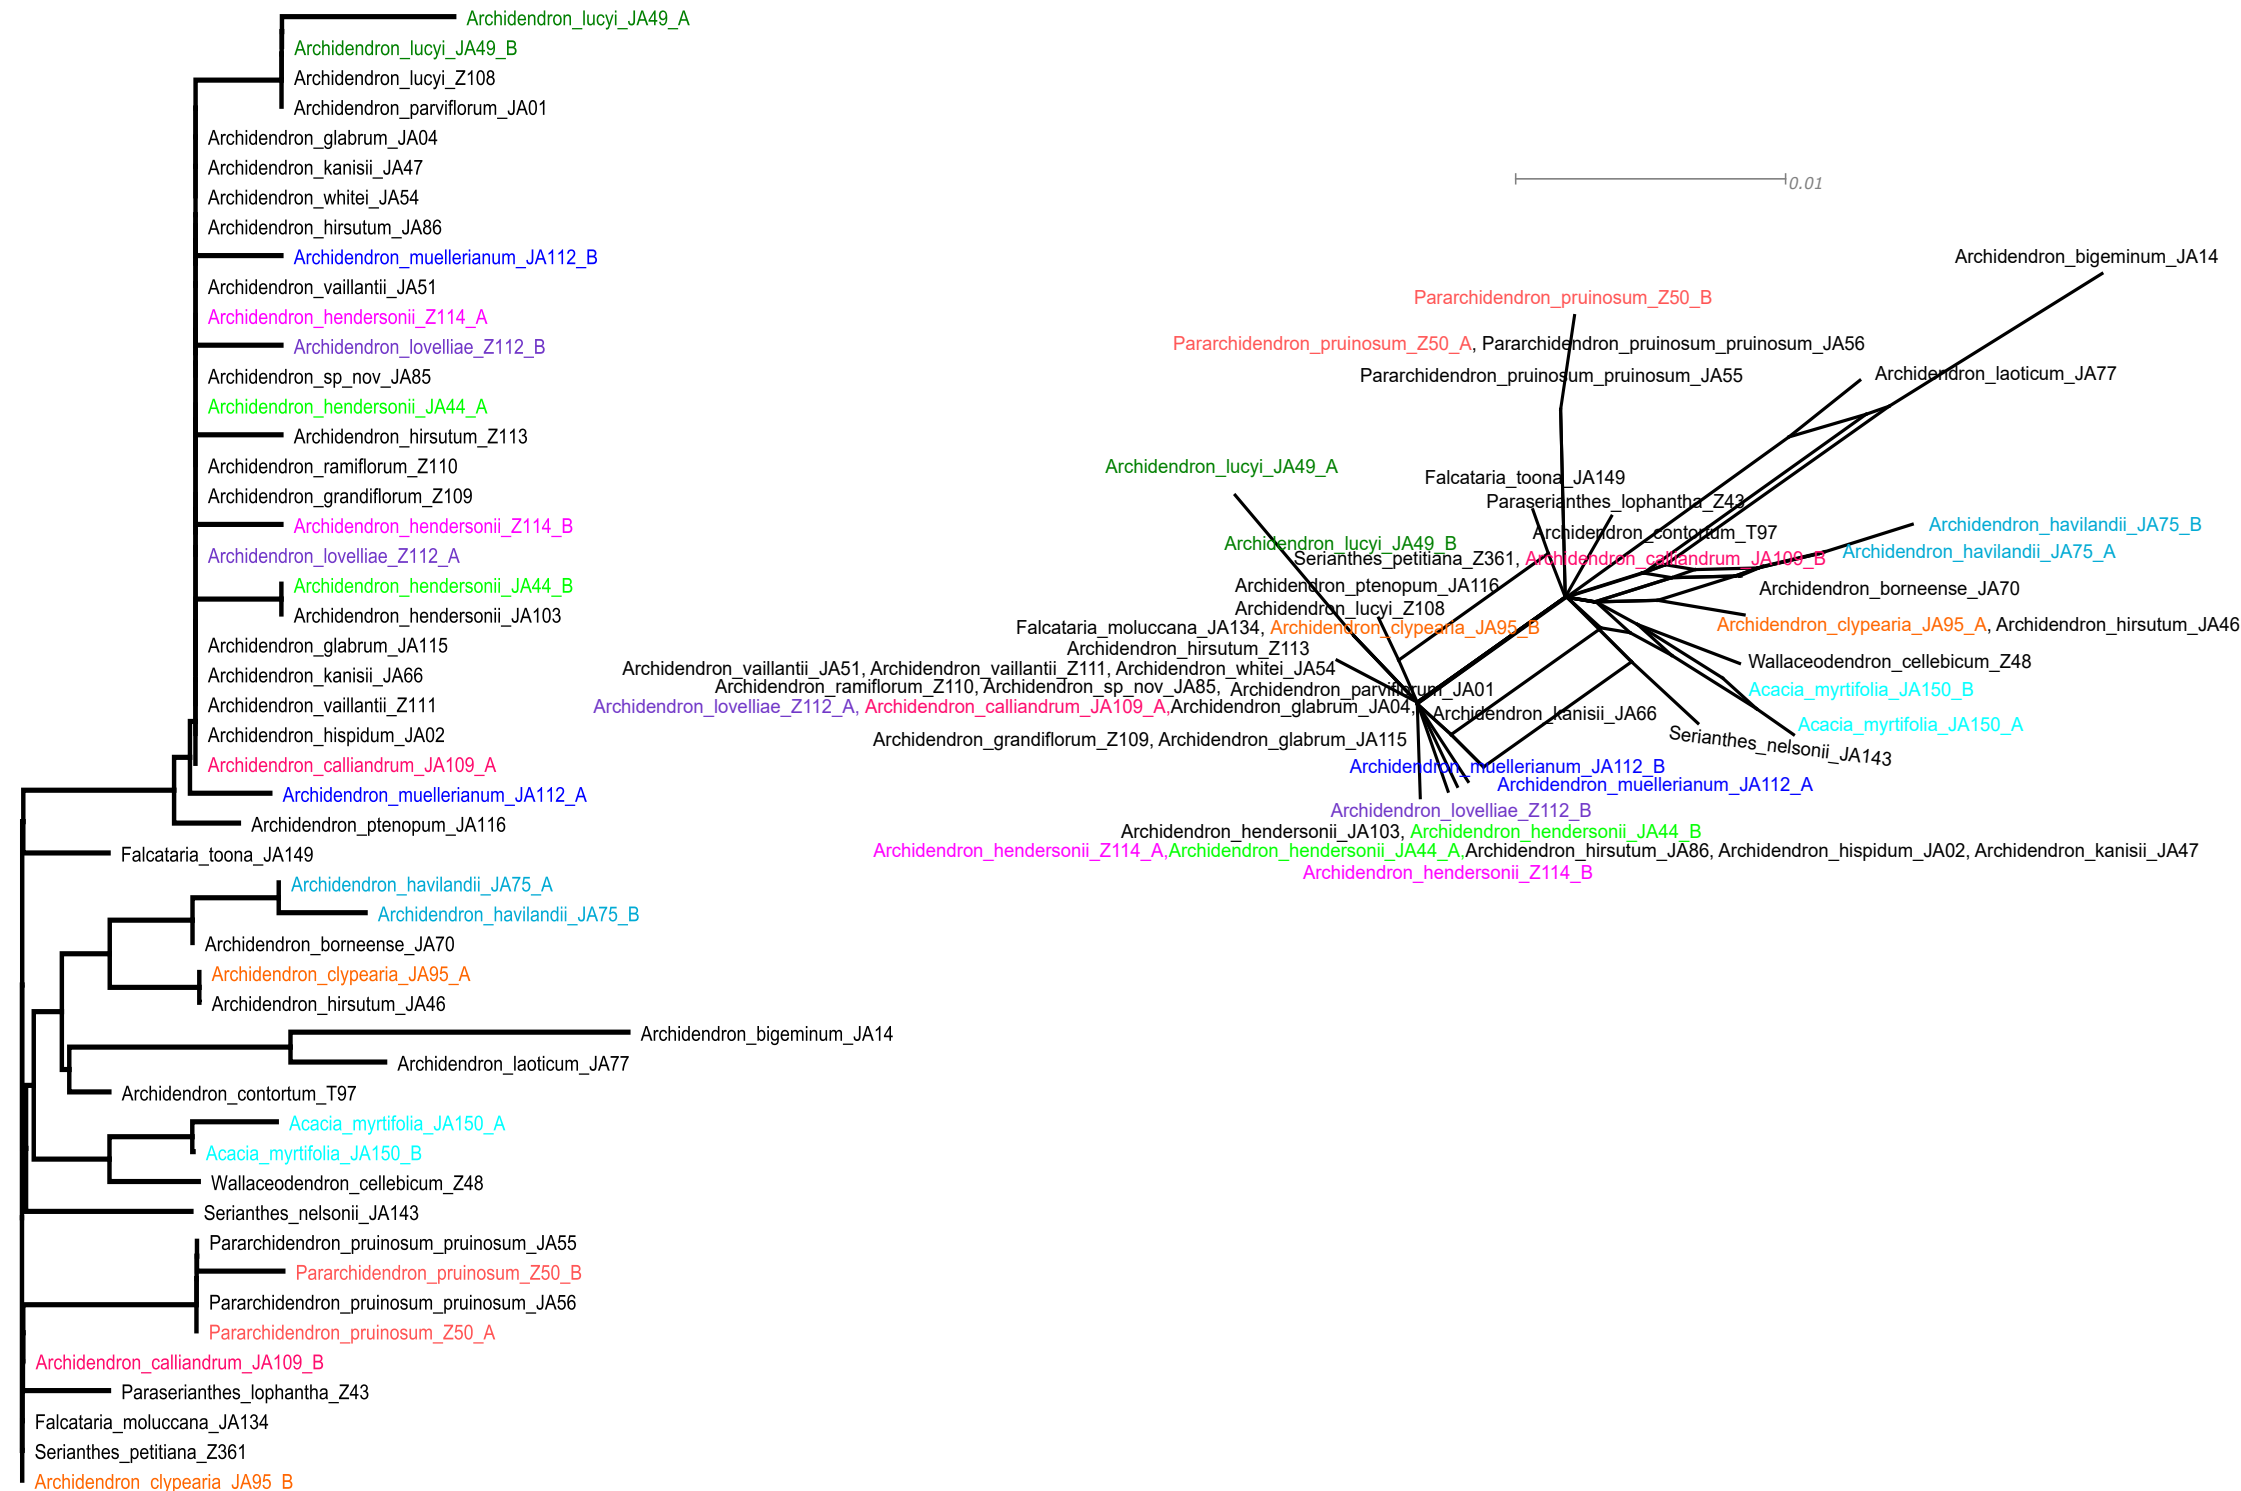

0.004
